# Supplementary material for: Quantifying cross-border movements and migrations for guiding the strategic planning of malaria control and elimination
Source: PubMed Central journal article supplement (PMC4057586; doi:10.1186/1475-2875-13-169), 2014-05-03

**Model 2 for Kenya, extending model to include age and gender:**

$$\begin{aligned} \log(M_{i,j}) = & \beta_0 + \beta_1 K_1 + \beta_2 K_2 + \beta_3 K_3 + \beta_4 K_4 + \beta_5 \log(P_j) + \beta_6 K_1 \log(P_j) + \beta_7 K_2 \log(P_j) + \beta_8 K_3 \log(P_j) \\ & + \beta_9 K_4 \log(P_j) + \beta_{10} \log(D_{i,j}) + \beta_{11} K_1 \log(D_{i,j}) + \beta_{12} K_2 \log(D_{i,j}) + \beta_{13} K_3 \log(D_{i,j}) \\ & + \beta_{14} K_4 \log(D_{i,j}) + \beta_{15} K_1 A_a + \beta_{16} K_2 A_a + \beta_{17} K_3 A_a + \beta_{18} K_4 A_a + \beta_{19} K_1 G_g + \beta_{20} K_2 G_g + \beta_{21} K_3 G_g \\ & + \beta_{22} K_4 G_g + \varepsilon_{i,j} \end{aligned}$$

$A_a$ : malaria-relevant age categories;  $a=8$ ; 1: < 5 years; 2: 5-9 years; 3: 10-19 years; 4: 20-29 years; 5: 30-39 years; 6: 40-49 years; 7: 50-59 years; 8: 60 plus

$G_g$ : gender categories;  $g=2$ ; 1: male, 2: female

Regression output:

| Explanatory variables | Regression Coefficient | Standard Error | t       | p-value  |
|-----------------------|------------------------|----------------|---------|----------|
| logPop                | 0.3318945              | 0.0092155      | 36.015  | < 2e-16  |
| logDist               | -0.3924936             | 0.0070194      | -55.916 | < 2e-16  |
| factor(AGE)2          | 0.0491894              | 0.0365404      | 1.346   | 0.178255 |
| factor(AGE)3          | 0.3969941              | 0.0317654      | 12.498  | < 2e-16  |
| factor(AGE)4          | 0.5879676              | 0.0310477      | 18.938  | < 2e-16  |
| factor(AGE)5          | 0.4560387              | 0.0317142      | 14.380  | < 2e-16  |
| factor(AGE)6          | 0.1964364              | 0.0339049      | 5.794   | 6.92e-09 |
| factor(AGE)7          | 0.0479760              | 0.0380357      | 1.261   | 0.207191 |
| factor(AGE)8          | 0.0280316              | 0.0389207      | 0.720   | 0.471392 |
| factor(GENDER)M       | 0.0009421              | 0.0158129      | 0.060   | 0.952494 |
| KE_ET:logPop          | -0.0575988             | 0.0173310      | -3.323  | 0.000890 |
| KE_SM:logPop          | 0.0762631              | 0.0153896      | 4.956   | 7.24e-07 |
| KE_SU:logPop          | 0.0836244              | 0.0142484      | 5.869   | 4.41e-09 |
| KE_UG:logPop          | -0.0801133             | 0.0122896      | -6.519  | 7.15e-11 |
| KE_ET:logDist         | 0.2292590              | 0.0124716      | 18.382  | < 2e-16  |
| KE_SM:logDist         | 0.2433380              | 0.0133431      | 18.237  | < 2e-16  |
| KE_SU:logDist         | 0.3116560              | 0.0254647      | 12.239  | < 2e-16  |
| KE_UG:logDist         | 0.5303973              | 0.0113675      | 46.659  | < 2e-16  |
| KE_ET:factor(AGE)2    | -0.0038053             | 0.0699597      | -0.054  | 0.956623 |
| KE_ET:factor(AGE)3    | -0.1433140             | 0.0625309      | -2.292  | 0.021916 |
| KE_ET:factor(AGE)4    | -0.2848937             | 0.0616237      | -4.623  | 3.79e-06 |
| KE_ET:factor(AGE)5    | -0.2495923             | 0.0646461      | -3.861  | 0.000113 |
| KE_ET:factor(AGE)6    | -0.0773828             | 0.0701320      | -1.103  | 0.269864 |
| KE_ET:factor(AGE)7    | 0.0008427              | 0.0767247      | 0.011   | 0.991237 |
| KE_ET:factor(AGE)8    | 0.0499196              | 0.0751771      | 0.664   | 0.506677 |
| KE_SM:factor(AGE)2    | 0.0093038              | 0.0636394      | 0.146   | 0.883767 |
| KE_SM:factor(AGE)3    | -0.1397553             | 0.0570119      | -2.451  | 0.014236 |
| KE_SM:factor(AGE)4    | -0.3212290             | 0.0567203      | -5.663  | 1.49e-08 |
| KE_SM:factor(AGE)5    | -0.2887977             | 0.0581382      | -4.967  | 6.81e-07 |
| KE_SM:factor(AGE)6    | -0.0198199             | 0.0622346      | -0.318  | 0.750129 |
| KE_SM:factor(AGE)7    | 0.0967190              | 0.0656521      | 1.473   | 0.140702 |
| KE_SM:factor(AGE)8    | 0.1598639              | 0.0656984      | 2.433   | 0.014965 |
| KE_SU:factor(AGE)2    | 0.0057587              | 0.0546070      | 0.105   | 0.916013 |
| KE_SU:factor(AGE)3    | -0.1539909             | 0.0489669      | -3.145  | 0.001663 |
| KE_SU:factor(AGE)4    | -0.3438848             | 0.0491193      | -7.001  | 2.57e-12 |
| KE_SU:factor(AGE)5    | -0.2580136             | 0.0510843      | -5.051  | 4.42e-07 |

|                       |            |           |         |          |
|-----------------------|------------|-----------|---------|----------|
| KE_SU:factor(AGE)6    | -0.1144147 | 0.0542600 | -2.109  | 0.034981 |
| KE_SU:factor(AGE)7    | -0.0157266 | 0.0600515 | -0.262  | 0.793411 |
| KE_SU:factor(AGE)8    | -0.0059988 | 0.0591863 | -0.101  | 0.919269 |
| KE_UG:factor(AGE)2    | -0.1316750 | 0.0458392 | -2.873  | 0.004074 |
| KE_UG:factor(AGE)3    | -0.1069047 | 0.0416495 | -2.567  | 0.010268 |
| KE_UG:factor(AGE)4    | -0.5140590 | 0.0413092 | -12.444 | < 2e-16  |
| KE_UG:factor(AGE)5    | -0.6951047 | 0.0421692 | -16.484 | < 2e-16  |
| KE_UG:factor(AGE)6    | -0.8076488 | 0.0443712 | -18.202 | < 2e-16  |
| KE_UG:factor(AGE)7    | -0.9628390 | 0.0484411 | -19.876 | < 2e-16  |
| KE_UG:factor(AGE)8    | -0.8576411 | 0.0491423 | -17.452 | < 2e-16  |
| KE_ET:factor(GENDER)M | 0.0442031  | 0.0321400 | 1.375   | 0.169036 |
| KE_SM:factor(GENDER)M | 0.0080601  | 0.0287825 | 0.280   | 0.779453 |
| KE_SU:factor(GENDER)M | 0.0455020  | 0.0258460 | 1.761   | 0.078329 |
| KE_UG:factor(GENDER)M | -0.0218555 | 0.0213185 | -1.025  | 0.305279 |

Age stratified origin-specific in-migrant occurrence plotted against Euclidean distance from shared border between origin countries and destination country, Kenya:

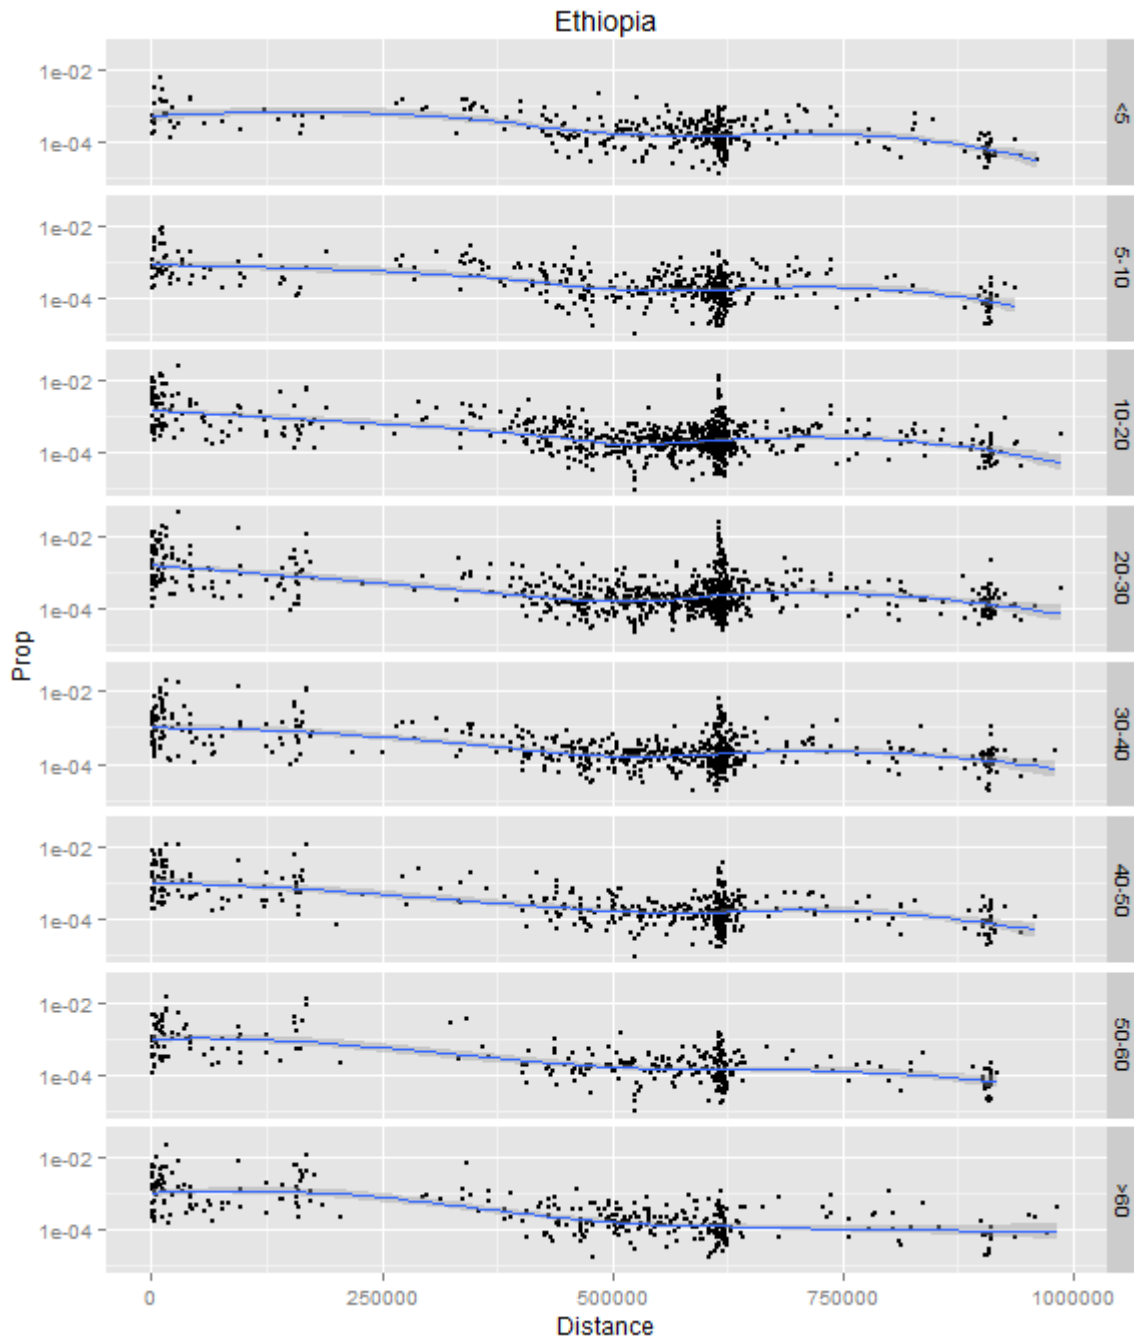

# Somalia

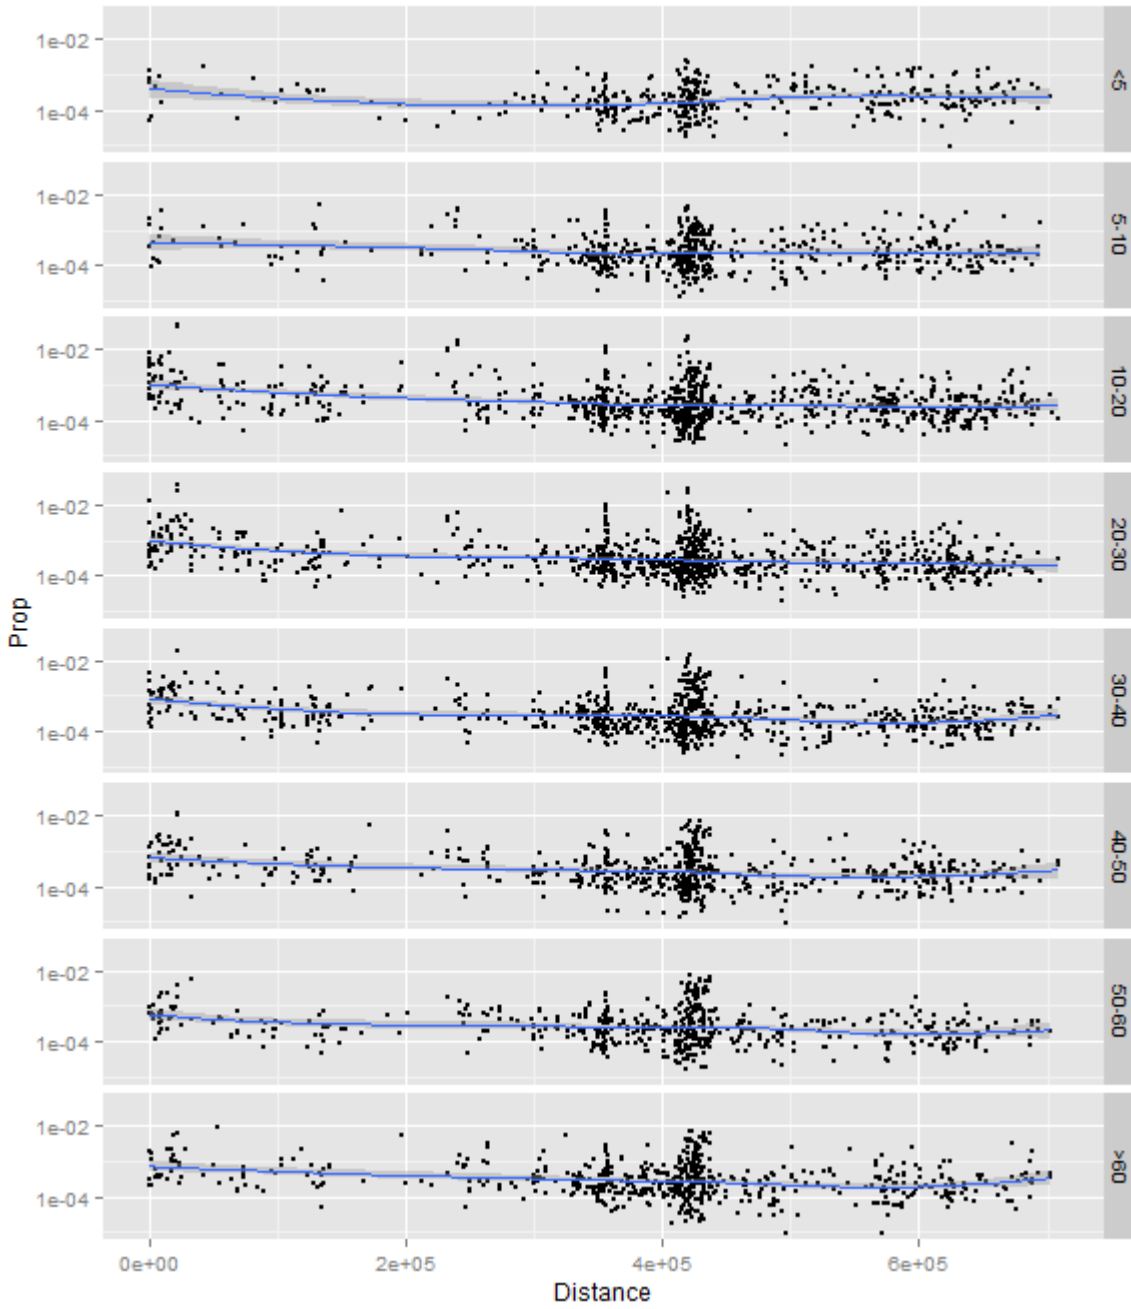

# Sudan

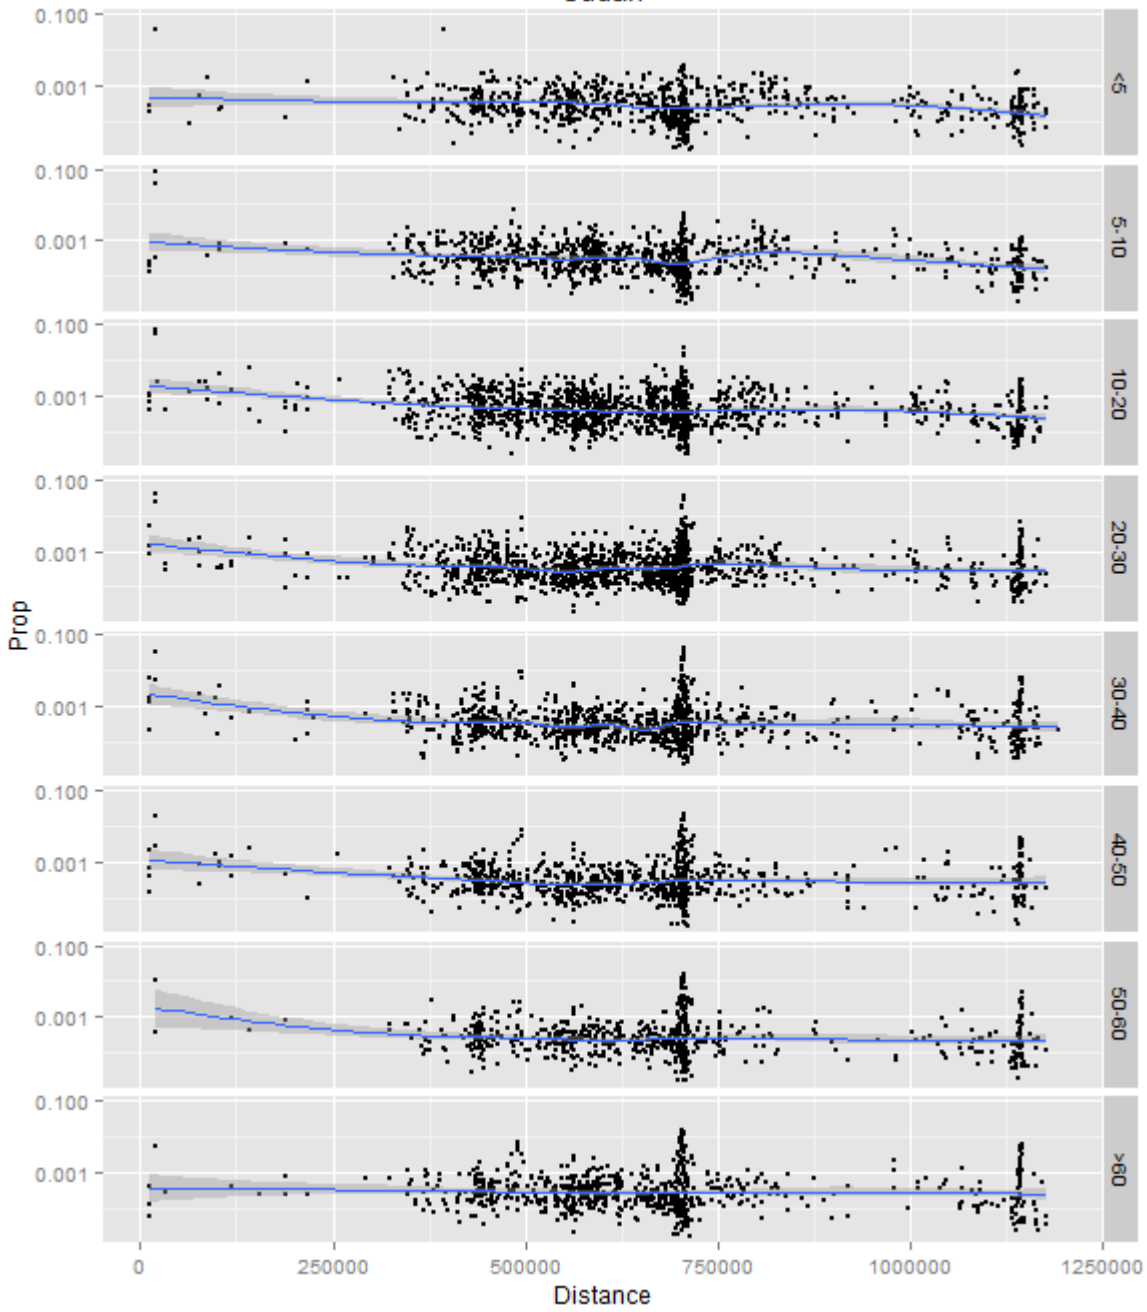

# Tanzania

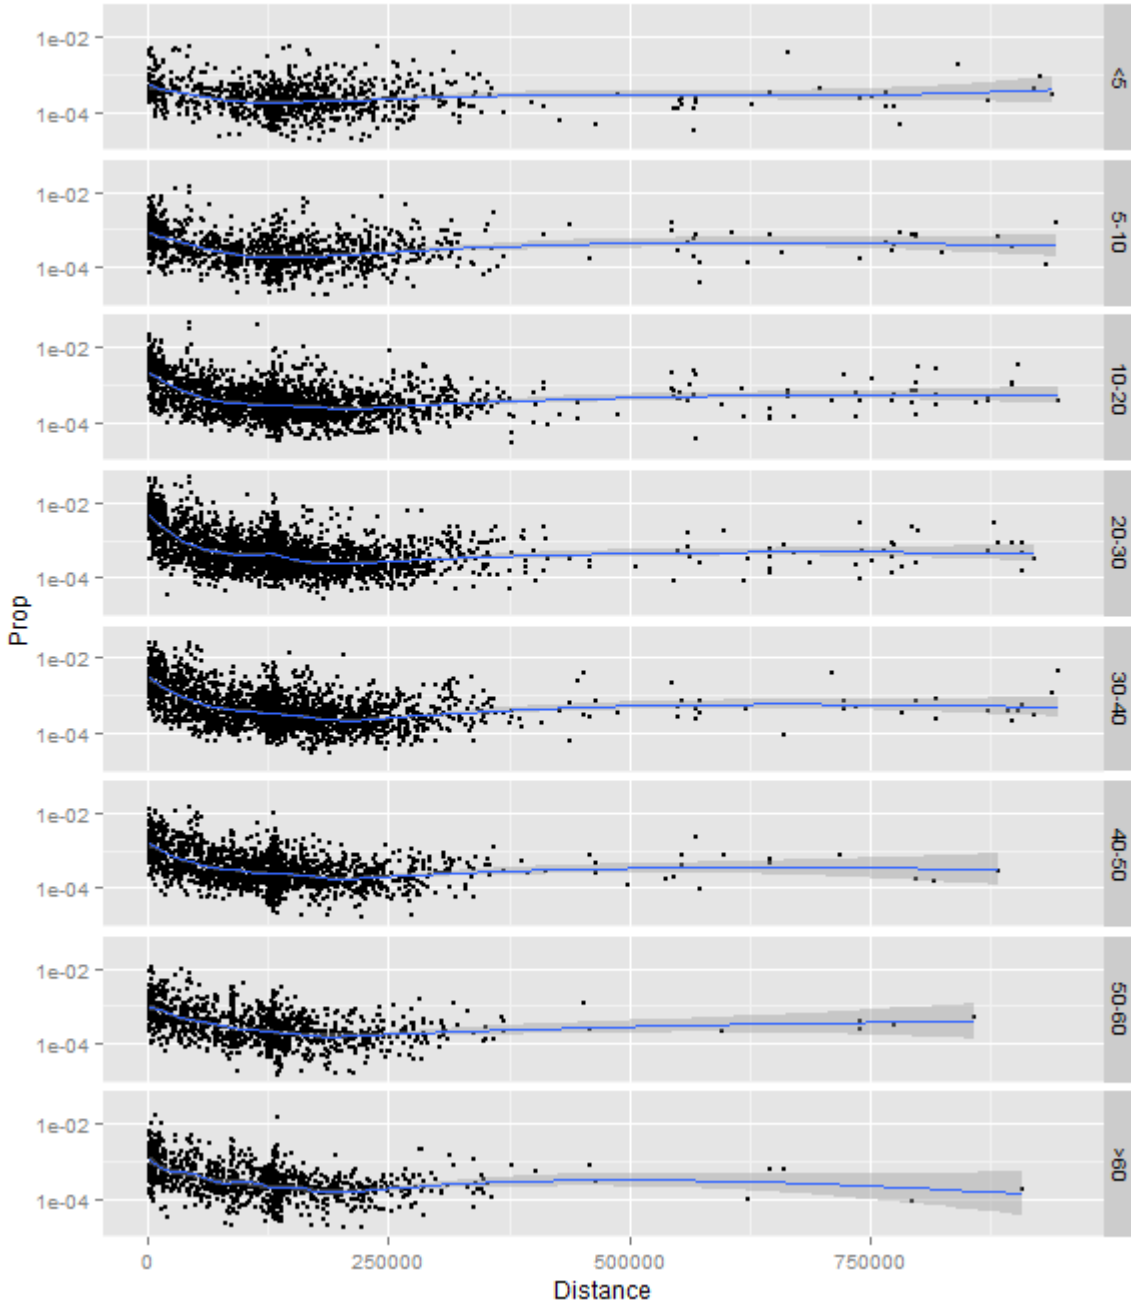

# Uganda

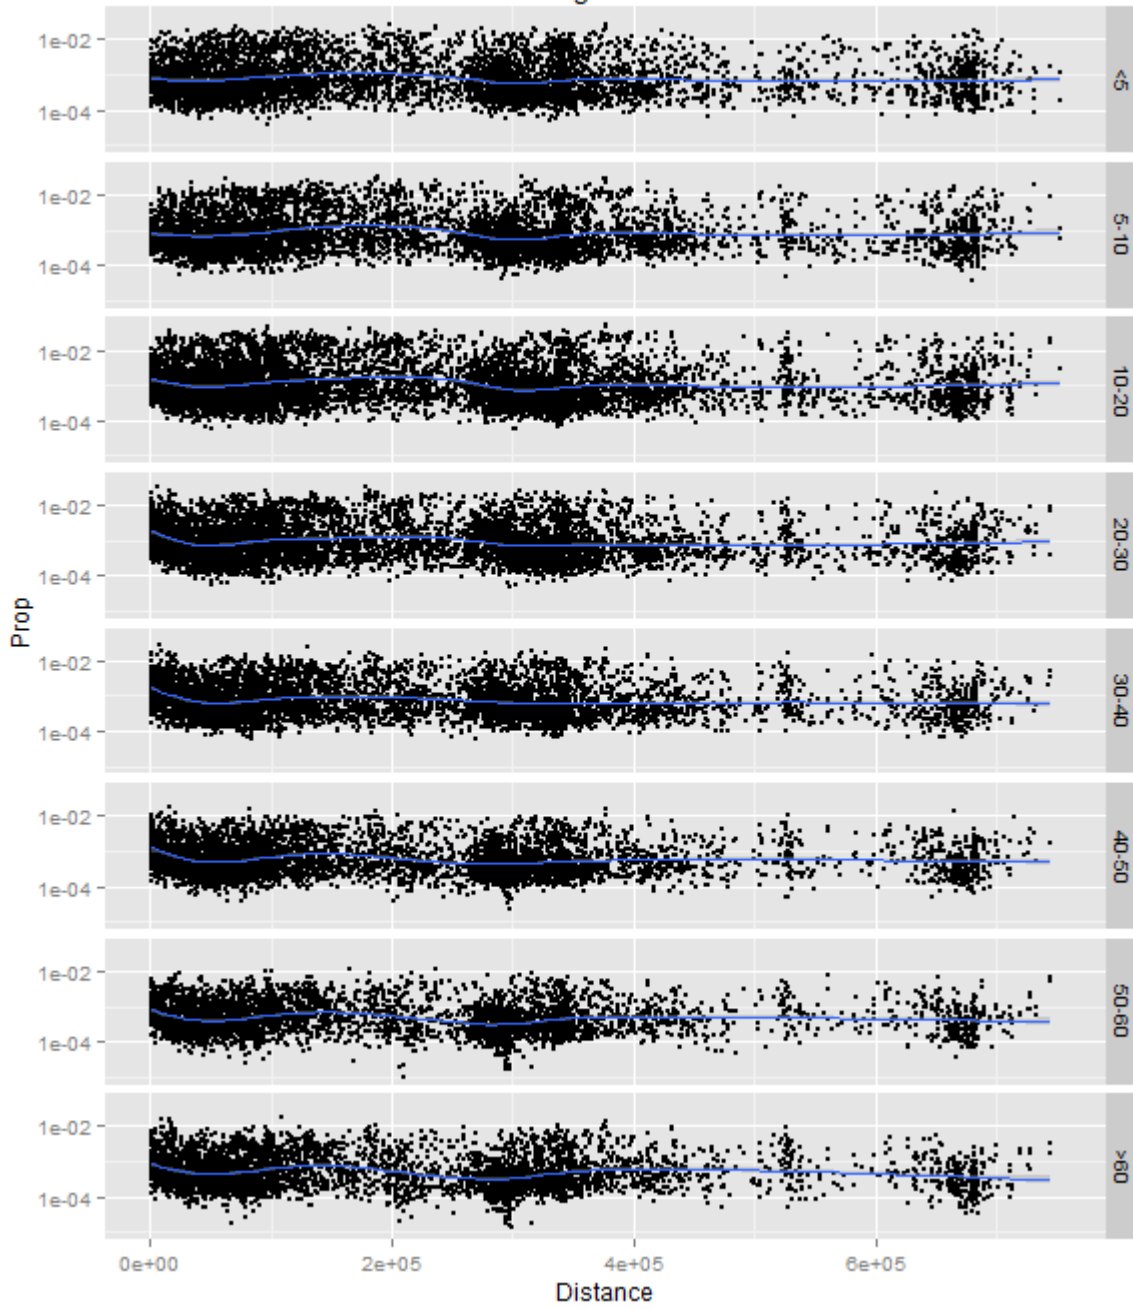

Gender stratified origin-specific in-migrant occurrence plotted against Euclidean distance from shared border between origin countries and destination country, Kenya:

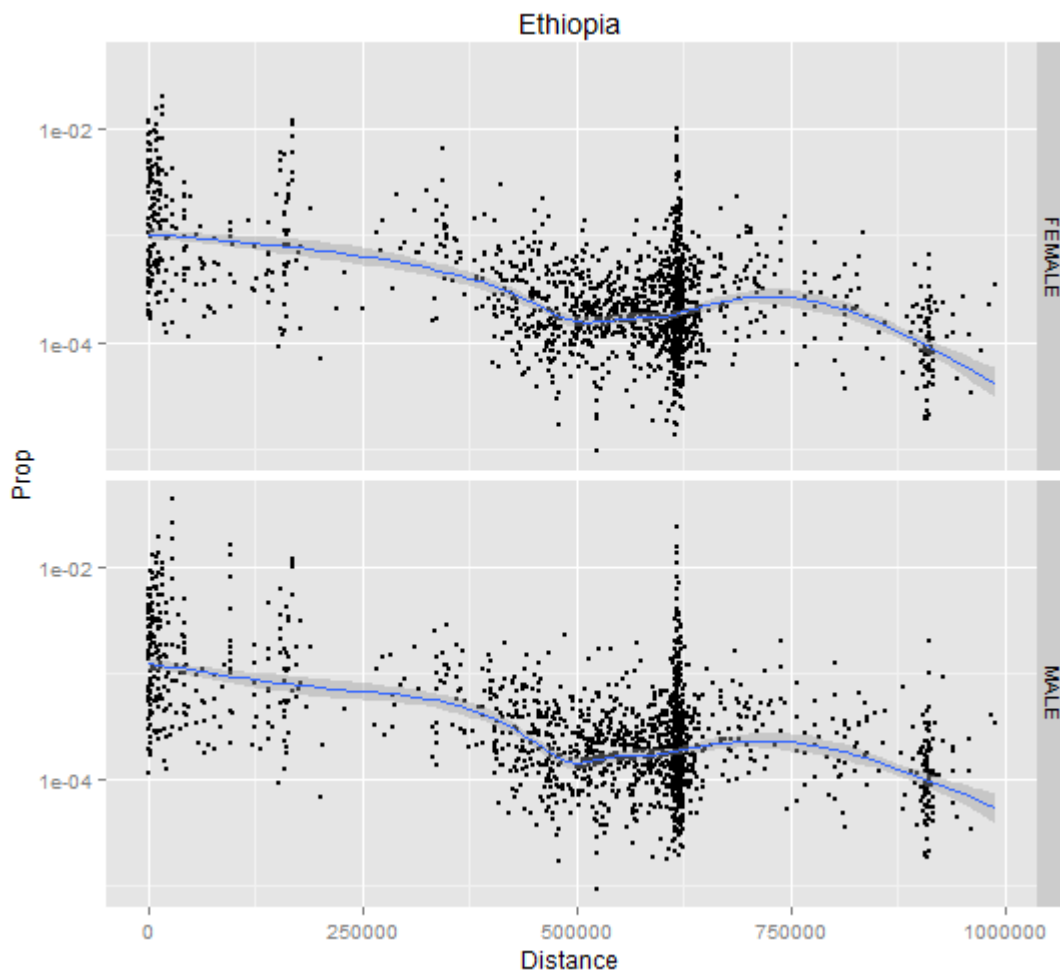



# Somalia

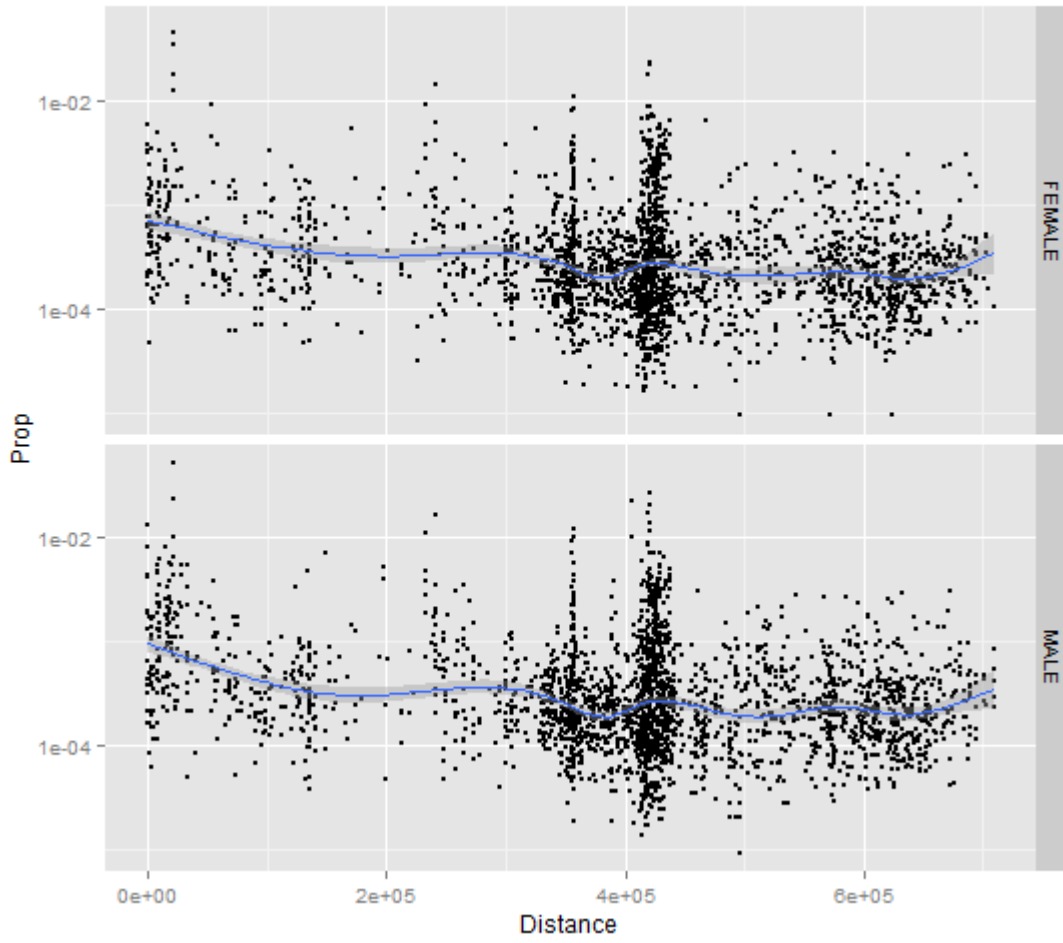

# Sudan

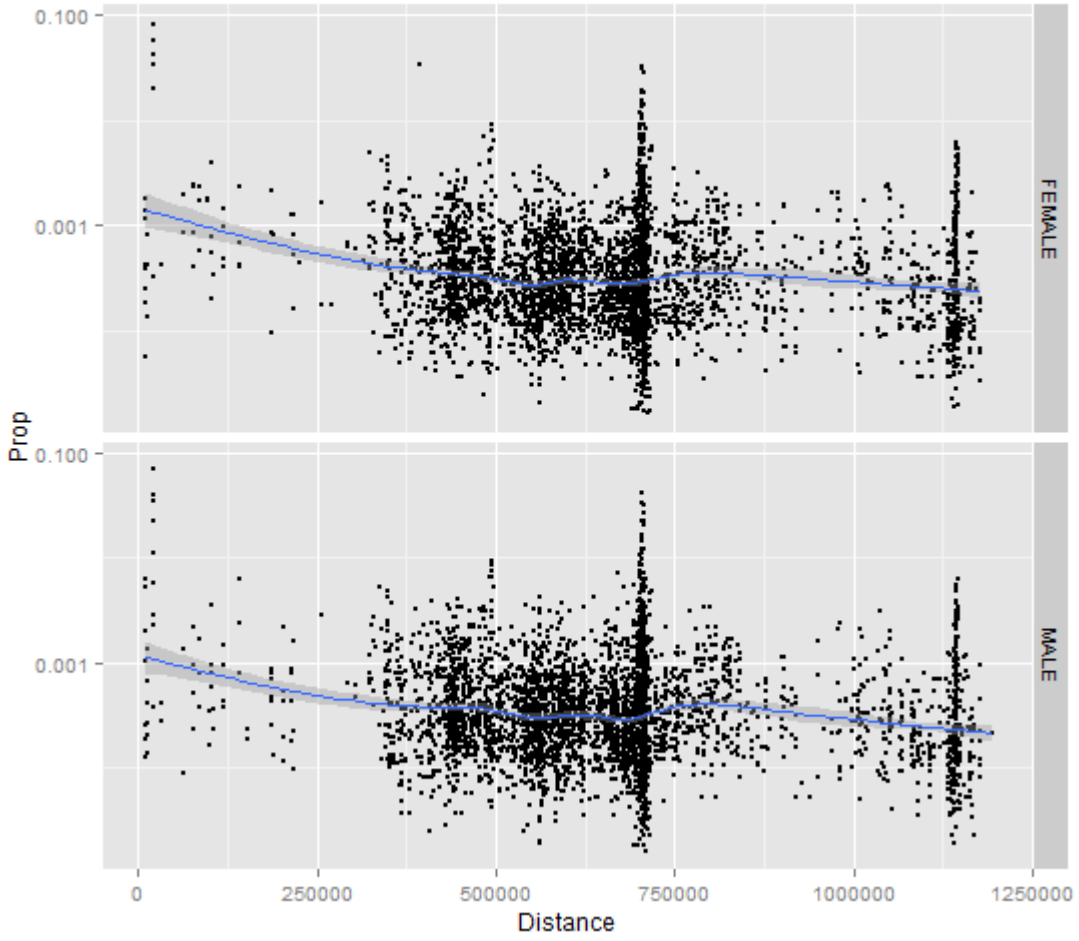

# Tanzania

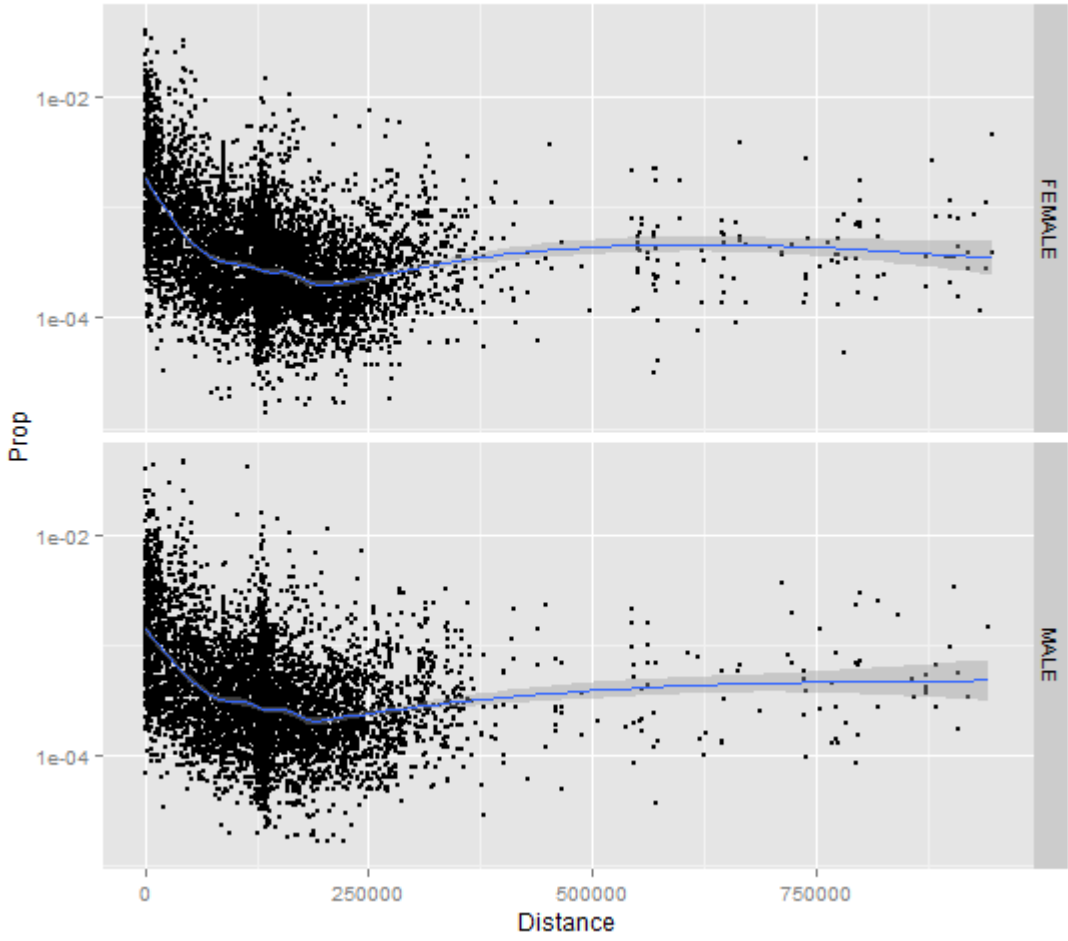

# Uganda

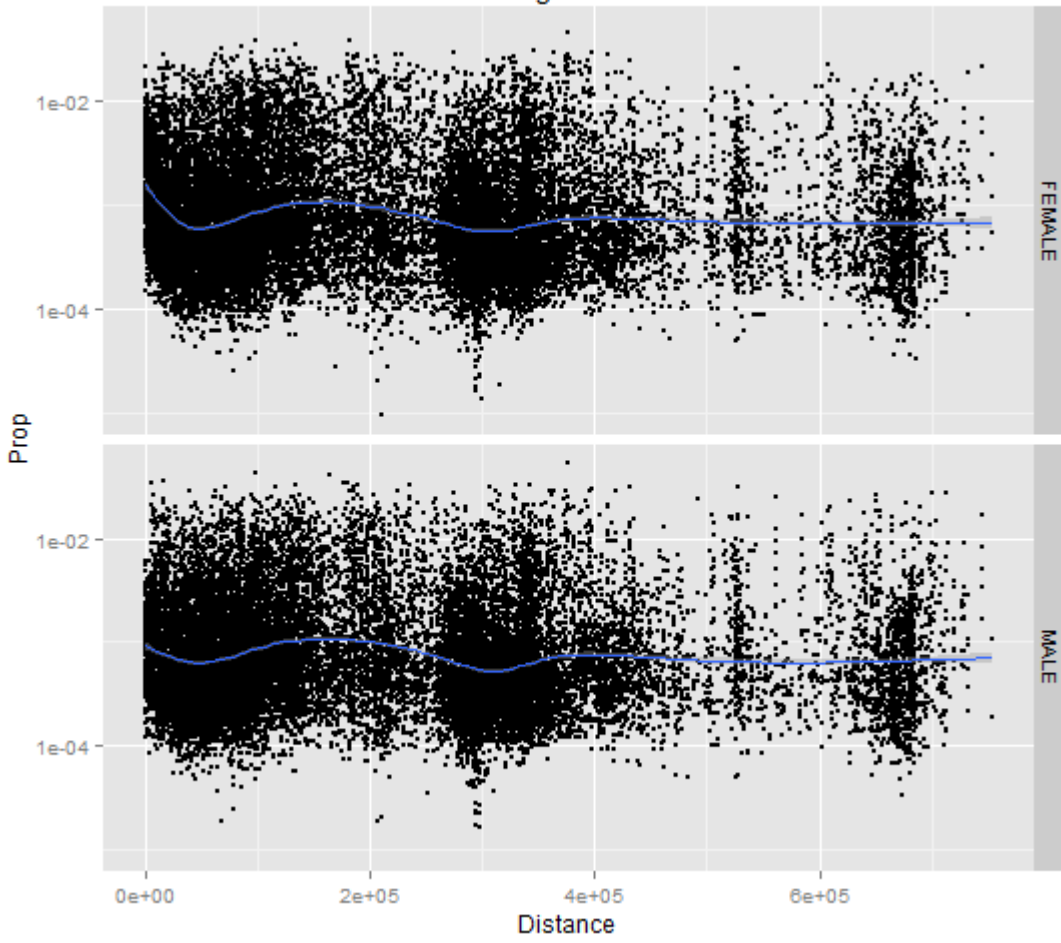

Supplement: 1475-2875-13-169-S2.pdf [file 1475-2875-13-169-S2.pdf]
