# Supplementary material for: Quantifying cross-border movements and migrations for guiding the strategic planning of malaria control and elimination
Source: PubMed Central journal article supplement (PMC4057586; doi:10.1186/1475-2875-13-169), 2014-05-03

(a) Ethiopian in-migrant hotspots

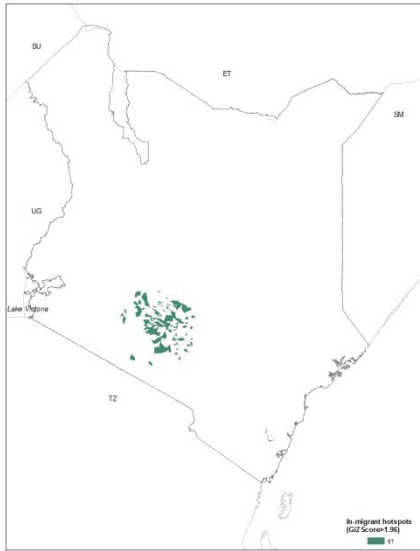

(b) Somali in-migrants

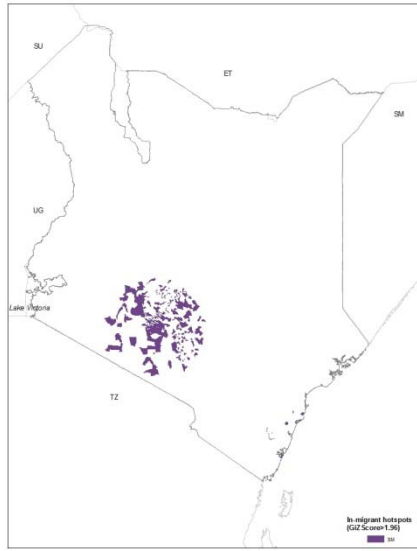

(c) Sudanese in-migrants

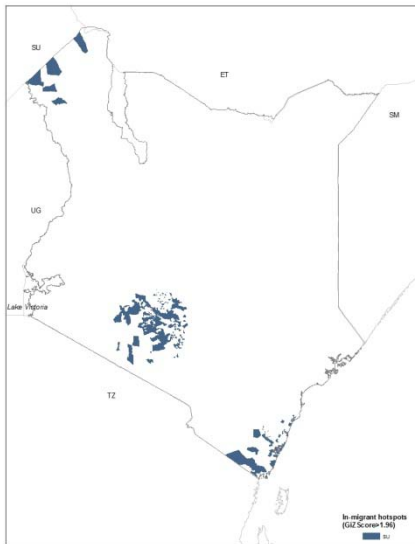

(d) Ugandan in-migrants

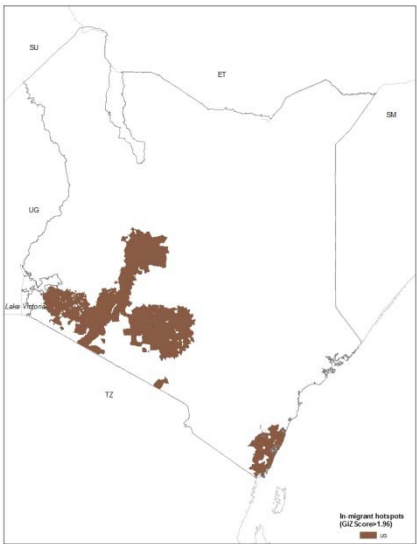

(e) Tanzanian in-migrants

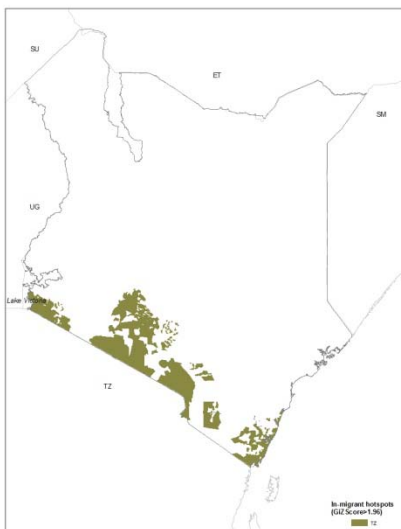

Hotspots indicating possible between country collaborations.

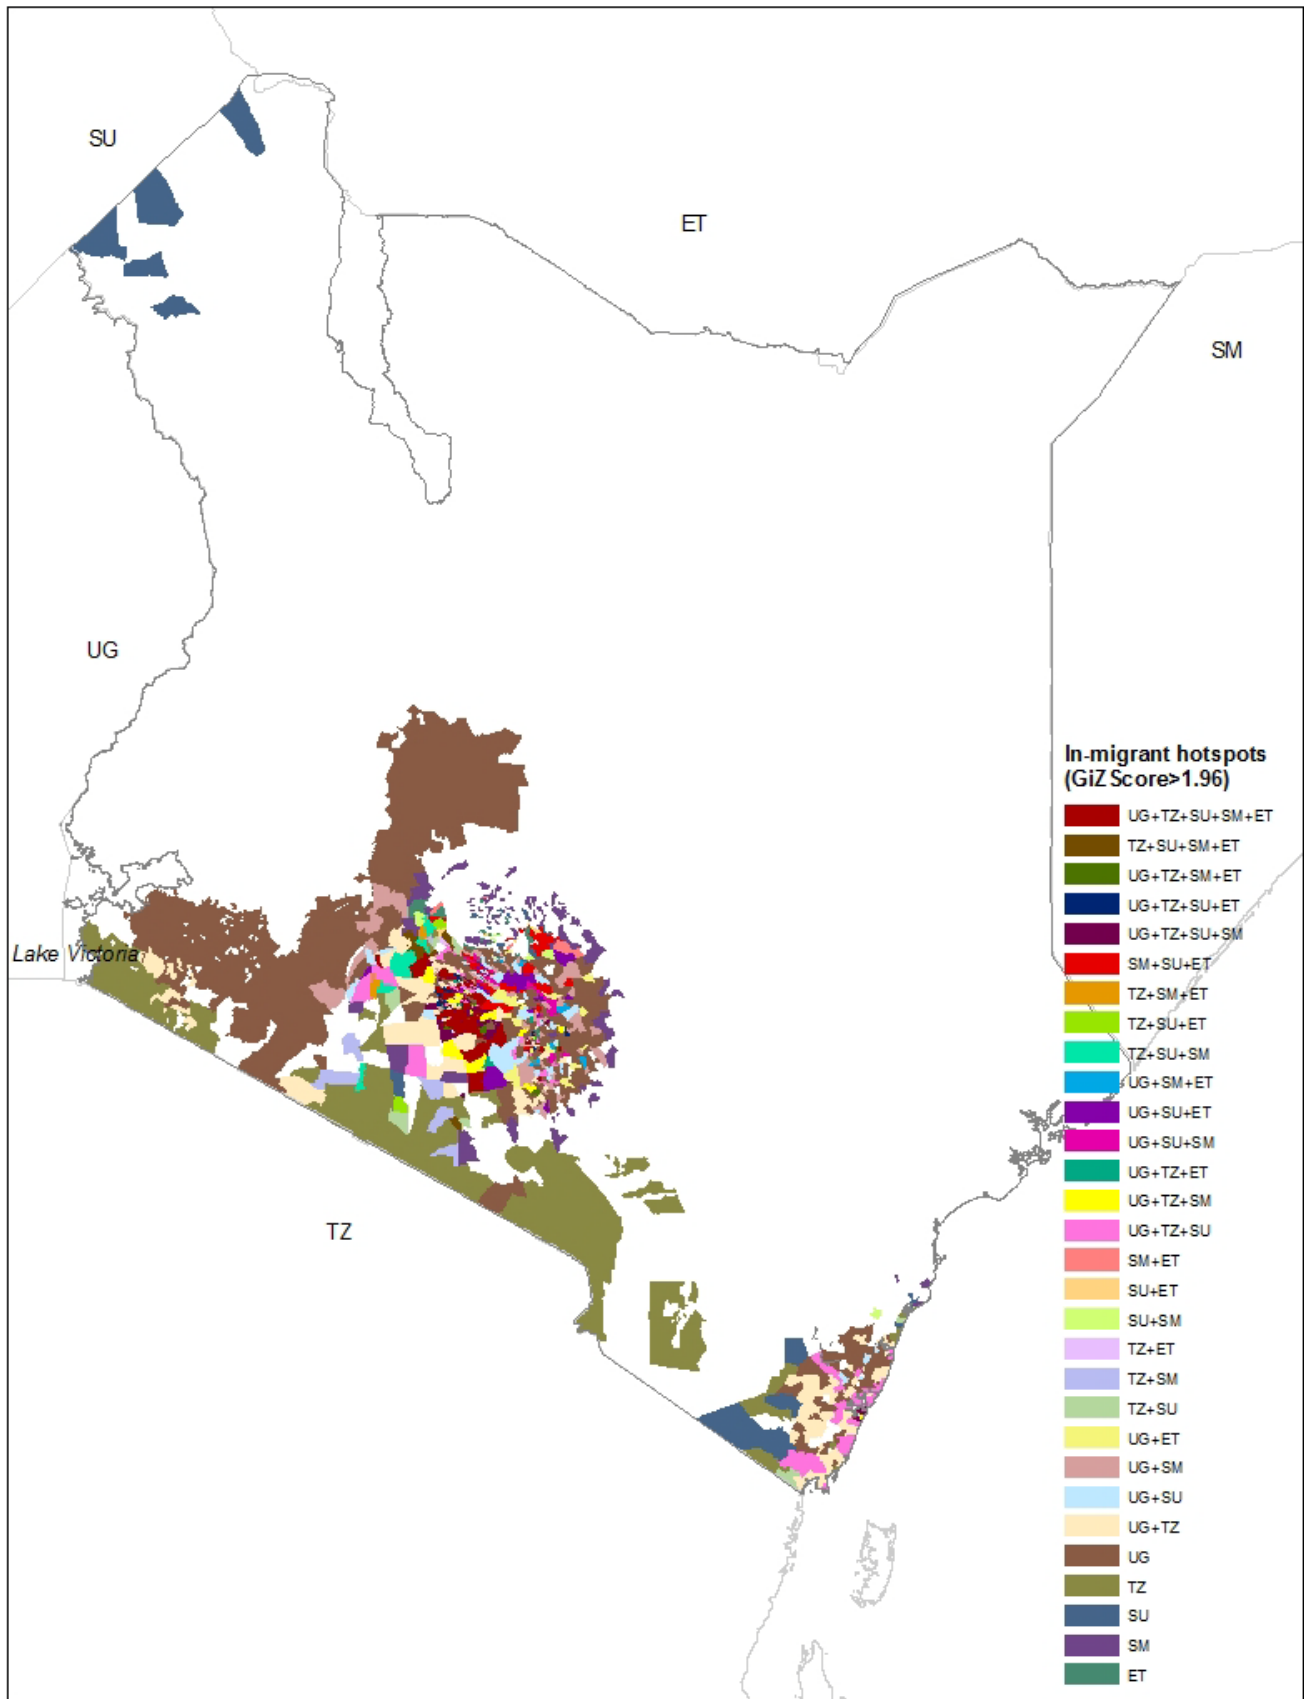

Supplement: 1475-2875-13-169-S3.pdf [file 1475-2875-13-169-S3.pdf]
